# Supplementary material for: Computational Model of Chimeric Antigen Receptors Explains Site-Specific Phosphorylation Kinetics
Source: PubMed Central journal article supplement — Biophys J. 2018 Aug 22;115(6):1116–29. doi: 10.1016/j.bpj.2018.08.018 (PMC6139883; doi:10.1016/j.bpj.2018.08.018), 2018-08-22
Supplement: mmc2.pdf [file mmc2.pdf]

```

begin model
#####
#
begin parameters
# molecules
LCK_T 20
CD3z_T 20000

#####
#####3

KmA1 1.50E+05
KmA2 27000
KmB1 6.03E+05
KmB2 27000
KmC1 8.64E+05
KmC2 27000

kcat 360

end parameters

#####
#
begin molecule types
LCK(b, Y394~U~P, Y505~U~P)
CD3z(A1~U~P, A2~U~P, B1~U~P, B2~U~P, C1~U~P, C2~U~P)

end molecule types

#####
#
begin seed species
LCK(b, Y394~P, Y505~U) LCK_T
CD3z(A1~U, A2~U, B1~U, B2~U, C1~U, C2~U) CD3z_T

end seed species

#####
#
begin observables
Molecules Total_A1 CD3z(A1~P!?)
Molecules Total_A2 CD3z(A2~P!?)
Molecules Total_B1 CD3z(B1~P!?)
Molecules Total_B2 CD3z(B2~P!?)
Molecules Total_C1 CD3z(C1~P!?)
Molecules Total_C2 CD3z(C2~P!?)

Molecules U_A1 CD3z(A1~U)
Molecules U_A2 CD3z(A1~P, B2~P, B1~P, A2~U)
Molecules U_B1 CD3z(A1~P, B2~P, B1~U)
Molecules U_B2 CD3z(A1~P, B2~U)
Molecules U_C1 CD3z(A1~P, B2~P, B1~P, A2~P, C2~P, C1~U)
Molecules U_C2 CD3z(A1~P, B2~P, B1~P, A2~P, C2~U)

end observables

#####
#
begin reaction rules # CD3z(A1~?, A2~?, B1~?, B2~?, C1~?, C2~?)

```

CD3z(A1~U) + LCK(b,Y394~P,Y505~U) -> CD3z(A1~P) + LCK(b,Y394~P,Y505~U)  
kcat/(U\_A1 + KmA1)

CD3z(A1~P,B2~U) + LCK(b,Y394~P,Y505~U) -> CD3z(A1~P,B2~P) +  
LCK(b,Y394~P,Y505~U) kcat/(U\_B2 + KmB2)

CD3z(A1~P,B2~P,B1~U) + LCK(b,Y394~P,Y505~U) -> CD3z(A1~P,B2~P,B1~P) +  
LCK(b,Y394~P,Y505~U) kcat/(U\_B1 + KmB1)

CD3z(A1~P,B2~P,B1~P,A2~U) + LCK(b,Y394~P,Y505~U) ->  
CD3z(A1~P,B2~P,B1~P,A2~P) + LCK(b,Y394~P,Y505~U) kcat/(U\_A2 + KmA2)

CD3z(A1~P,B2~P,B1~P,A2~P,C2~U) + LCK(b,Y394~P,Y505~U) ->  
CD3z(A1~P,B2~P,B1~P,A2~P,C2~P) + LCK(b,Y394~P,Y505~U) kcat/(U\_C2 + KmC2)

CD3z(A1~P,B2~P,B1~P,A2~P,C2~P,C1~U) + LCK(b,Y394~P,Y505~U) ->  
CD3z(A1~P,B2~P,B1~P,A2~P,C2~P,C1~P) + LCK(b,Y394~P,Y505~U) kcat/(U\_C1 +  
KmC1)

end reaction rules

end model

generate\_network({overwrite=>1});  
writeMfile({});
