# Supplementary material for: Computational Model of Chimeric Antigen Receptors Explains Site-Specific Phosphorylation Kinetics
Source: PubMed Central journal article supplement — Biophys J. 2018 Aug 22;115(6):1116–29. doi: 10.1016/j.bpj.2018.08.018 (PMC6139883; doi:10.1016/j.bpj.2018.08.018), 2018-08-22
Supplement: mmc7.pdf [file mmc7.pdf]

**Initial Conditions:**

|                           | CD3ζ | LCK  | Phosphatase |
|---------------------------|------|------|-------------|
| molecules/μm <sup>2</sup> | 1    | 1000 | 10-100000   |

**Parameter Values:**

|                               | k <sub>cat</sub><br>(min <sup>-1</sup> ) | K <sub>M,A1</sub><br>(μm <sup>-2</sup> ) | K <sub>M,A2</sub><br>(μm <sup>-2</sup> ) | K <sub>M,B1</sub><br>(μm <sup>-2</sup> ) | K <sub>M,B2</sub><br>(μm <sup>-2</sup> ) | K <sub>M,C1</sub><br>(μm <sup>-2</sup> ) | K <sub>M,C2</sub><br>(μm <sup>-2</sup> ) | X <sub>i</sub> |
|-------------------------------|------------------------------------------|------------------------------------------|------------------------------------------|------------------------------------------|------------------------------------------|------------------------------------------|------------------------------------------|----------------|
| <b>LCK parameters</b>         | 360                                      | 97                                       | 332                                      | 270                                      | 154                                      | 485                                      | 405                                      | 0.115          |
| <b>Phosphatase parameters</b> | 360                                      | 11                                       | 36                                       | 32                                       | 18                                       | 67                                       | 57                                       | 0.1            |

**Equations:**

$$\frac{dpY_{A1}}{dt} = \frac{\left(\frac{K_{cat}}{K_{M,A1}}\right)(Y_{A1})(LCK)}{1 + \frac{Y_{A1}}{K_{M,A1}} + \frac{Y_{A2}}{K_{M,A2}} + \frac{Y_{B1}}{K_{M,B1}} + \frac{Y_{B2}}{K_{M,B2}} + \frac{Y_{C1}}{K_{M,C1}} + \frac{Y_{C2}}{K_{M,C2}} + \frac{pY_{A1}}{K_{I,A1}} + \frac{pY_{A2}}{K_{I,A2}} + \frac{pY_{B1}}{K_{I,B1}} + \frac{pY_{B2}}{K_{I,B2}} + \frac{pY_{C1}}{K_{I,C1}} + \frac{pY_{C2}}{K_{I,C2}}} - \frac{\left(\frac{P_{cat}}{P_{M,A1}}\right)(pY_{A1})(Phos)}{1 + \frac{pY_{A1}}{P_{M,A1}} + \frac{pY_{A2}}{P_{M,A2}} + \frac{pY_{B1}}{P_{M,B1}} + \frac{pY_{B2}}{P_{M,B2}} + \frac{pY_{C1}}{P_{M,C1}} + \frac{pY_{C2}}{P_{M,C2}} + \frac{Y_{A1}}{P_{I,A1}} + \frac{Y_{A2}}{P_{I,A2}} + \frac{Y_{B1}}{P_{I,B1}} + \frac{Y_{B2}}{P_{I,B2}} + \frac{Y_{C1}}{P_{I,C1}} + \frac{Y_{C2}}{P_{I,C2}}}$$

$$\frac{dY_{A1}}{dt} = - \frac{\left(\frac{K_{cat}}{K_{M,A1}}\right)(Y_{A1})(LCK)}{1 + \frac{Y_{A1}}{K_{M,A1}} + \frac{Y_{A2}}{K_{M,A2}} + \frac{Y_{B1}}{K_{M,B1}} + \frac{Y_{B2}}{K_{M,B2}} + \frac{Y_{C1}}{K_{M,C1}} + \frac{Y_{C2}}{K_{M,C2}} + \frac{pY_{A1}}{K_{I,A1}} + \frac{pY_{A2}}{K_{I,A2}} + \frac{pY_{B1}}{K_{I,B1}} + \frac{pY_{B2}}{K_{I,B2}} + \frac{pY_{C1}}{K_{I,C1}} + \frac{pY_{C2}}{K_{I,C2}}} + \frac{\left(\frac{P_{cat}}{P_{M,A1}}\right)(pY_{A1})(Phos)}{1 + \frac{pY_{A1}}{P_{M,A1}} + \frac{pY_{A2}}{P_{M,A2}} + \frac{pY_{B1}}{P_{M,B1}} + \frac{pY_{B2}}{P_{M,B2}} + \frac{pY_{C1}}{P_{M,C1}} + \frac{pY_{C2}}{P_{M,C2}} + \frac{Y_{A1}}{P_{I,A1}} + \frac{Y_{A2}}{P_{I,A2}} + \frac{Y_{B1}}{P_{I,B1}} + \frac{Y_{B2}}{P_{I,B2}} + \frac{Y_{C1}}{P_{I,C1}} + \frac{Y_{C2}}{P_{I,C2}}}$$

$$\frac{dpY_{A2}}{dt} = \frac{\left(\frac{K_{cat}}{K_{M,A2}}\right)(Y_{A2})(LCK)}{1 + \frac{Y_{A1}}{K_{M,A1}} + \frac{Y_{A2}}{K_{M,A2}} + \frac{Y_{B1}}{K_{M,B1}} + \frac{Y_{B2}}{K_{M,B2}} + \frac{Y_{C1}}{K_{M,C1}} + \frac{Y_{C2}}{K_{M,C2}} + \frac{pY_{A1}}{K_{I,A1}} + \frac{pY_{A2}}{K_{I,A2}} + \frac{pY_{B1}}{K_{I,B1}} + \frac{pY_{B2}}{K_{I,B2}} + \frac{pY_{C1}}{K_{I,C1}} + \frac{pY_{C2}}{K_{I,C2}}} - \frac{\left(\frac{P_{cat}}{P_{M,A2}}\right)(pY_{A2})(Phos)}{1 + \frac{pY_{A1}}{P_{M,A1}} + \frac{pY_{A2}}{P_{M,A2}} + \frac{pY_{B1}}{P_{M,B1}} + \frac{pY_{B2}}{P_{M,B2}} + \frac{pY_{C1}}{P_{M,C1}} + \frac{pY_{C2}}{P_{M,C2}} + \frac{Y_{A1}}{P_{I,A1}} + \frac{Y_{A2}}{P_{I,A2}} + \frac{Y_{B1}}{P_{I,B1}} + \frac{Y_{B2}}{P_{I,B2}} + \frac{Y_{C1}}{P_{I,C1}} + \frac{Y_{C2}}{P_{I,C2}}}$$
